# Supplementary material
Source: MDPI journal article supplement (https://www.mdpi.com/2076-3417/9/5/956)
Supplement: s1 [file s1]

# Supporting information: In Situ SEM Observation of Structured Si/C Anodes Reactions in an Ionic-Liquid-Based Lithium-Ion Battery

Huifeng Shi <sup>1</sup>, Xianqiang Liu <sup>1</sup>, Rui Wu <sup>1</sup>, Yijing Zheng <sup>2</sup>, Yonghe Li <sup>1</sup>, Xiaopeng Cheng <sup>1</sup>,

Wilhelm Pfleging <sup>2,3,\*</sup> and Yuefei Zhang <sup>1,\*</sup>

<sup>1</sup> Institute of Microstructure and Property of Advanced Materials, Beijing University of Technology, Beijing 100124, China; shihuifeng@emails.bjut.edu.cn (H.S.); xqliu@bjut.edu.cn (X.L.); R.Wu@emails.bjut.edu.cn (R.W.); yongheli2013@gmail.com (Y.L.); xpcheng@emails.bjut.edu.cn (X.C.)

<sup>2</sup> Institute for Applied Materials (IAM-AWP) Karlsruhe Institute of Technology, Karlsruhe, Germany; Yijing.zheng@kit.edu (Y.Z.)

<sup>3</sup> Karlsruhe Nano Micro Facility (KNMF), Karlsruhe, Germany

\* Correspondence: [yfzhang@bjut.edu.cn](mailto:yfzhang@bjut.edu.cn) (Yuefei Z.); wilhelm.pfleging@kit.edu (W.P.); Tel.: +86-10-6739-2635 (Yuefei Z.)

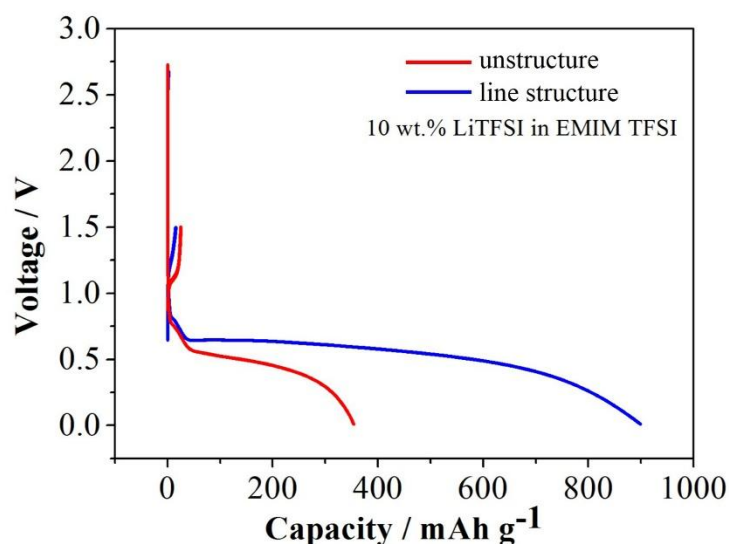

**Figure S1.** Charge–discharge curves of the un-/line structured Si/C composites at the rate 100 mA/g.

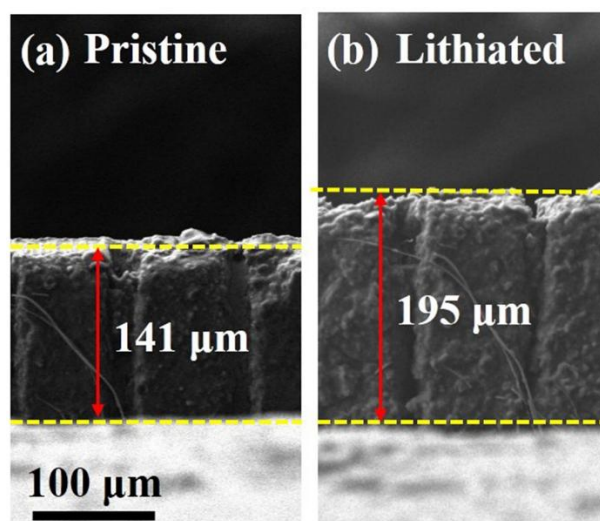

**Figure S2.** SEM images of (a) pristine and (b) lithiated Si/C composites.

The calculation of expansion in length:  $(195 - 141) / 8000 * 2 = 1.35\%$  (The length of total Si/C anode is 8 mm).
